1 ***Precision medicine for pandemics: stratification of COVID-19 molecular***  
2 ***phenotypes defined by topological analysis of global blood gene expression.***

3  
4 Rebekah Penrice-Randal <sup>1,2</sup>, Fabio Strazzeri <sup>1</sup>, Benoit Ernst <sup>3</sup>, Brice Van Eeckhout <sup>4</sup>,  
5 Julien Guiot <sup>3</sup>, Anna Julie Peired <sup>5</sup>, Cosimo Nardi <sup>5</sup>, Erika Parkinson <sup>1</sup>, Monique Henket  
6 <sup>3</sup>, Alicia Staderoli <sup>3</sup>, Elora Guglielmi <sup>3</sup>, Anne-Françoise Dive <sup>3</sup>, Laurie Giltay <sup>3</sup>, Sara  
7 Tomassetti <sup>6</sup>, Rebecca Baker <sup>7</sup>, Kit Howard <sup>7</sup>, Catherine Hartley <sup>2</sup>, Tessa Prince <sup>2</sup>,  
8 Thomas Kleyntssens <sup>4</sup>, Tommaso Manciuilli <sup>8</sup>, Ratko Djukanovic <sup>9,10</sup>, Tristan Clark <sup>9,10</sup>,  
9 Diana Baralle <sup>10,11</sup>, Scott S Wagers <sup>12</sup>, Xiaodan Xing <sup>13</sup>, Yang Nan <sup>13</sup>, Shiyi Wang <sup>13</sup>,  
10 Simon Walsh <sup>14</sup>, Guang Yang <sup>13</sup>, Paul J Skipp <sup>1,15</sup>, Julian A Hiscox <sup>2,16,17</sup>, James P R  
11 Schofield <sup>1</sup>.

12  
13  
14 **Affiliations:**

15 <sup>1</sup>TopMD Precision Medicine Ltd, Southampton, United Kingdom

16 <sup>2</sup>Institute of Infection, Veterinary and Ecological Sciences, University of Liverpool,  
17 Liverpool, UK.

18 <sup>3</sup>Department of Respiratory Medicine, University Hospital of Liège, Liège, Belgium.

19  
20 <sup>4</sup>Comunicare Solutions, Liège, Belgium.

21  
22 <sup>5</sup>Department of Experimental and Clinical Biomedical Sciences “Mario Serio”,  
23 University of Florence, Viale Morgagni 50, 50134 Florence, Italy.

24  
25 <sup>6</sup>Department of Clinical and Experimental Medicine, Careggi University Hospital,  
26 Largo Brambilla 3, 50134 Florence, IT

27  
28 <sup>7</sup>Clinical Data Interchange Standards Consortium (CDISC), Austin, TX, United States  
29 of America

30  
31 <sup>8</sup>Department of Experimental and Clinical Medicine, University of Florence, Florence,  
32 Italy.

NOTE: This preprint reports new research that has not been certified by peer review and should not be used to guide clinical practice.

33

34 <sup>9</sup>Clinical and Experimental Sciences, Faculty of Medicine, University of  
35 Southampton, Southampton, United Kingdom

36

37 <sup>10</sup>National Institute for Health Research Southampton Biomedical Research Centre,  
38 Southampton, United Kingdom

39

40 <sup>11</sup>School of Human Development and Health, Faculty of Medicine, University of  
41 Southampton, Southampton, United Kingdom

42

43 <sup>12</sup>BioSci Consulting, Maasmechelen, Belgium

44

45 <sup>13</sup>Department of Bioengineering and Imperial-X, Imperial College London

46

47 <sup>14</sup>National Heart and Lung Institute, Imperial College London

48

49 <sup>15</sup>School of Biological Sciences, University of Southampton, Southampton, UK

50

51 <sup>16</sup>NIHR Health Protection Research Unit in Emerging and Zoonotic Infections,  
52 Liverpool, UK.

53

54 <sup>17</sup>A\*STAR Infectious Diseases Laboratories (A\*STAR ID Labs), Agency for Science,  
55 Technology and Research (A\*STAR), Singapore.

56

57 **Abstract:**

58 Precision medicine offers a promising avenue for better therapeutic responses to  
59 pandemics such as COVID-19. This study leverages independent patient cohorts in  
60 Florence and Liège gathered under the umbrella of the DRAGON consortium for the  
61 stratification of molecular phenotypes associated with COVID-19 using topological  
62 analysis of global blood gene expression. Whole blood from 173 patients was collected  
63 and RNA was sequenced on the Novaseq platform. Molecular phenotypes were  
64 defined through topological analysis of gene expression relative to the biological  
65 network using the TopMD algorithm. The two cohorts from Florence and Liège allowed  
66 for independent validation of the findings in this study. Clustering of the topological  
67 maps of differential pathway activation revealed three distinct molecular phenotypes  
68 of COVID-19 in the Florence patient cohort, which were also observed in the Liège  
69 cohort.

70

71 Cluster 1 was characterised by high activation of pathways associated with ESC  
72 pluripotency, NRF2, and TGF- $\beta$  receptor signalling. Cluster 2 displayed high activation  
73 of pathways including focal adhesion-PI3K-Akt-mTOR signalling and type I interferon  
74 induction and signalling, while Cluster 3 exhibited low IRF7-related pathway activation.  
75 TopMD was also used with the Drug-Gene Interaction Database (DGIdb), revealing  
76 pharmaceutical interventions targeting mechanisms across multiple phenotypes and  
77 individuals.

78

79 The data illustrates the utility of molecular phenotyping from topological analysis of  
80 blood gene expression, and holds promise for informing personalised therapeutic  
81 strategies not only for COVID-19 but also for Disease X. Its potential transferability  
82 across multiple diseases highlights the value in pandemic response efforts, offering  
83 insights before large-scale clinical studies are initiated.

84

85

86 **Introduction:**

87

88 The ongoing challenges of COVID-19, triggered by the emergence of SARS-CoV-2,  
89 necessitate a detailed understanding of disease heterogeneity. Despite extensive  
90 research characterising the host response to SARS-CoV-2 through pre-clinical (1, 2),  
91 and clinical (3-6) functional genomic data, there have been limited approaches that  
92 have used data from and encompassed the range of symptom severity, disease  
93 heterogeneity and delivered personalised medicine.

94

95 Examination of gene expression patterns in blood has been used in previous studies  
96 to identify molecular phenotypes associated with different disease profiles in several  
97 emerging viral infections including Ebola virus (EBOV) (7) and SARS-CoV-2 (1, 2, 4,  
98 5), as well as more endemic infections such as influenza virus (8). Medical  
99 countermeasures focus on either reducing viral load through anti-virals. These target  
100 viral biology or modulate the host response to infection to reduce sequelae such as  
101 inflammation. For many viruses there is a clear correlation between viral load, disease  
102 severity and outcome (survival/death). This is best typified by the Ebola virus where  
103 low viral loads correlate with survival and high viral loads correlate with death (9). For  
104 SARS-CoV-2 this correlation is less obvious. In animal models of disease, such as the  
105 ferret, viral load was correlated with symptomology (10); in humans, there is less data  
106 to support an association between viral load and disease. However, studies have  
107 shown that severe COVID-19 is associated with dysregulated immune pathology in  
108 organs such as the lungs and the respiratory tract (3, 11).

109

110 With any emerging viral pathogen, direct acting antivirals take time to develop and  
111 trial. Identifying therapeutics that can modulate the host response to reduce  
112 symptomology remain a priority. Being able to rapidly characterise aberrations in host  
113 pathways that lead to disease and marrying this with therapeutics on the FDA  
114 approved list will enhance pandemic preparedness and rapid response. Therefore, a  
115 deeper understanding of the host response can be used to guide the selection of host  
116 directed medication countermeasures.

117

118

119

120 The field of digital health and precision medicine is rapidly evolving, with emerging  
121 technologies and initiatives aimed at integrating diverse datasets to inform clinical  
122 decision-making. In this study we offer a novel way to analyse complex data collected  
123 by the DRAGON international consortium which enables rapid identification of targets  
124 for treatment by novel and/or re-purposed drugs. Within DRAGON, efforts have been  
125 made to harmonise data in digital healthcare, proposing guidelines for the integration  
126 of clinical data from various modalities. (12). Additionally, an online platform has been  
127 developed to host validated COVID-19 predictive models, facilitating their utilisation  
128 by clinicians in real-time decision-making (13). However, challenges persist, as  
129 evidenced by the limited success of outcome prediction models for COVID-19 patients  
130 based on demographic and comorbidity data, which highlights the need for more  
131 sophisticated approaches (14).

132

133 While omics data has been instrumental in advancing our understanding of SARS-  
134 CoV-2 and COVID-19, its integration into digital health platforms for clinical decision-  
135 making remains limited (15-17). Traditional molecular phenotyping approaches often  
136 provide only shallow insights. In previous work, using topological analysis, we  
137 demonstrated how gene expression data derived from whole blood at the time of  
138 admission could predict ICU admission (5). However, the current study analysed the  
139 blood transcriptomes of patients with COVID-19 as part of the DRAGON-EU  
140 consortium and used TopMD, an algorithm that considers all available data across a  
141 landscape of pathways, to characterize molecular phenotypes of COVID-19 patients  
142 admitted to hospital. Pathways were identified that correlated with clinical disease in  
143 the patient cohort. TopMD mapped pathways onto a database containing information  
144 on FDA approved drugs and their known gene and pathway interactions to generate  
145 a list of potential therapeutics for modulating severe COVID-19. The ability to rapidly  
146 identify and therapeutically modulate host pathways responsible for disease with pre-  
147 existing medical countermeasures will be important in the emergence of novel  
148 diseases and future pandemics.

149

150 This study describes an analysis of the blood transcriptomes of patients with COVID-  
151 19 admitted to hospital in Liège and Florence between February and July 2021, as  
152 part of the DRAGON-EU consortium. Alongside collecting blood samples,  
153 demographic and clinical observations were recorded; additionally, CT scan data were

154 obtained for a subset of these patients. We applied an unsupervised approach, in  
155 which we characterised the molecular phenotypes of patients within this cohort. We  
156 have previously reported the development of a gene signature in patients with COVID-  
157 19, predictive of admission to ICU (5). This predictive signature revealed the activation  
158 of pathways regulating epidermal growth factor receptor (EGFR) signalling,  
159 peroxisome proliferator-activated receptor alpha (PPAR- $\alpha$ ) signalling and transforming  
160 growth factor beta (TGF- $\beta$ ) signalling. The observed molecular phenotype aligns with  
161 the mechanisms implicated in pulmonary fibrosis, which is also associated with  
162 increased severity of disease (18-20).  
163

164 **Methods:**

165

166 **Study population and sample collection and ethics**

167 Blood samples were obtained from 132 patients severe enough to require admission  
168 because of COVID-19 at Careggi University Hospital, Florence, Italy, and 41 from a  
169 pre-defined, separate patient cohort in Liège, between February and July 2021. All  
170 patients tested positive nasopharyngeal swab PCR for SARS-CoV-2 infection. Blood  
171 samples were collected on Day 0 of hospital admission. The protocol was approved  
172 by the ethics committee of the University Hospital of Liège (reference number 2021/89)  
173 and the ethics committee of the UNIFI (#18085/OSS). Informed consent was obtained  
174 for every participant.

175

176 **Ethical Approval statement**

177 The work described has been carried out in accordance with The Code of Ethics of  
178 the World Medical Association (Declaration of Helsinki) for experiments involving  
179 humans. All procedures were performed in compliance with relevant laws and  
180 institutional guidelines and have been approved by the appropriate institutional  
181 committees. Informed consent was obtained for every participant.

182 Clinical data were collected from the patients' electronic medical records by the  
183 investigators, and included age, sex, BMI, comorbid conditions etc. The data were  
184 then assembled using the Study Data Tabulation Model (SDTM) data format  
185 developed by the Clinical Data Interchange Standards Consortium (CDISC).

186 **Chest CT analysis**

187 Out of the 173 patients with RNA sequencing data, chest CT data was obtained from  
188 109 patients using a 128-detector multislice Spiral Computed Tomography (MSCT)  
189 (Somatom Definition AS, Siemens Healthcare, Erlangen, Germany) applying the  
190 following parameters: current × exposure time 150 mAs, tube voltage 100 kV, rotation  
191 time 0.3 s, pitch 1.2 mm, pixel size 0.465 mm, beam collimation 128 × 0.6 mm, both  
192 slice thickness and reconstruction 1 mm, and reconstruction kernel Bf70 very sharp.  
193 Axial images were carried out from lung apexes to bases with patient at full inspiration  
194 and breath hold. Post-processing, 1-mm-thick sections were reconstructed on  
195 coronal and sagittal planes oriented on the tracheal plane. Intravenous contrast

196 medium was not administered. Chest CT images were displayed on a 24-inch medical  
197 monitor with a 3-megapixel Barco display (Barco, Kortrijk, Belgium) and 2048 x 1536  
198 resolution. The software programs originally implemented to MSCT were used for  
199 image assessment. Images of each patient were evaluated for scan quality  
200 considering inspiratory level and motion artifacts. Data pulled out from CT  
201 examinations included CO-RADS, chest CT score, dominant pattern, and  
202 typical/atypical findings. Specifically:

### 203 **CO-RADS**

204 CO-RADS score based on COVID-19 lung involvement and variable from 1 to  
205 5, with higher values reflecting a greater level of suspicion of COVID-19  
206 infection with lung involvement. CO-RADS is a score used to diagnose COVID-  
207 19 and does not inevitably reproduce the severity of lung alterations. Low  
208 scores corresponded to CT examinations with alterations less likely related to  
209 COVID-19 infection. The 5-score CO-RADS scale is as follows: 1: very low level  
210 of suspicion; 2: low level of suspicion; 3: equivocal findings; 4: high level of  
211 suspicion; 5: very high level of suspicion.

### 212 **Chest CT score for lobe involvement**

213 Ranging from 0 to 5, namely 0: 0%; 1: <5%; 2: 5-25%; 3: 26-50%; 4: 51-75%;  
214 5: >75%.

### 215 **Dominant chest CT pattern**

216 Evaluated in relation to the prevalent alterations among ground-glass opacities,  
217 consolidations, ground-glass opacities together with consolidations, crazy-  
218 paving, and reverse halo, as defined by the Fleischner Society.

### 219 **Dominant chest CT distribution**

220 Lower lobes, upper lobes, peripheral, bronchocentric, dorsal, or diffuse.

### 221 **Additional COVID-19 related findings**

222 Represented by pleural thickening, vascular enlargement, subpleural sign, halo  
223 sign air, bubble sign, perilobular pattern, and subpleural sparing.

### 224 **Additional findings not typical for COVID-19**

225 Represented by pleural effusion, pericardial effusion, lymphadenopathy,



226 cavitation, tree-in-bud, discrete small nodules, isolated lobar/segmental  
227 consolidation, atelectasis, and smooth interlobular septal thickening.

## 228 **RNA extraction**

229 Total RNA was extracted from PAXgene BRT using the PAXgene Blood RNA Kit  
230 (PreAnalytix), according to the manufacturer's protocol. Extracted RNA was stored at  
231 -80°C until further use. Following the manufacturer's protocols, total RNA was used  
232 as input material into the QIAseq FastSelect-rRNA/Globin Kit (Qiagen) protocol to  
233 remove cytoplasmic and mitochondrial rRNA and globin mRNA with a fragmentation  
234 time of 7 or 15 minutes. Subsequently the NEBNext® Ultra™ II Directional RNA Library  
235 Prep Kit for Illumina® (New England Biolabs) was used to generate the RNA libraries,  
236 followed by 11 or 13 cycles of amplification and purification using AMPure XP beads.  
237 Each library was quantified using Qubit and the size distribution assessed using the  
238 Agilent 2100 Bioanalyser and the final libraries were pooled in equimolar ratios.  
239 Libraries were sequenced using 150 bp paired-end reads on an Illumina® NovaSeq  
240 6000 (Illumina®, San Diego, USA).

241

## 242 **Bioinformatics**

243 Raw fastq files were trimmed using fastp (21). Trimmed paired end sequencing reads  
244 were inputted into salmon (v1.5.2) using the -l A -validateMappings -SeqBias -gcBias  
245 parameters (22). Quant files generated with salmon were imported into RStudio (4.1.1)  
246 using tximport to infer gene expression (23). The edgeR package (3.34.1) was used  
247 to normalise and scale sequencing libraries (24). Sequencing reads are available  
248 under BioProject ID: PRJNA1085259 on Short Read Archive (SRA).

249

## 250 **Molecular phenotypes mapped by topological analysis**

251 Molecular phenotypes were mapped by topological analysis, using TopMD to measure  
252 the shape of global gene expression relative to the biological network (TopMD Patent  
253 number GB202306368D0). TopMD works in the following way: The biological network  
254 used was an interaction network retrieved from the STRING database (25). The gene  
255 nodes of the biological network were assigned vertices according to the measured  
256 gene expression. The topological shape, or landscape, of this network is then  
257 measured by TopMD's algorithm, clustering differential gene expression hotspots,  
258 corresponding to modulated gene pathways. These pathways have 'volume'

259 comprising the sum of squared differential gene expression of clustered genes, where  
260 the most differentially activated pathways have the highest pathway topological  
261 volumes. The molecular phenotype is defined as the global profile of volumes of  
262 differential pathway activation.  
263

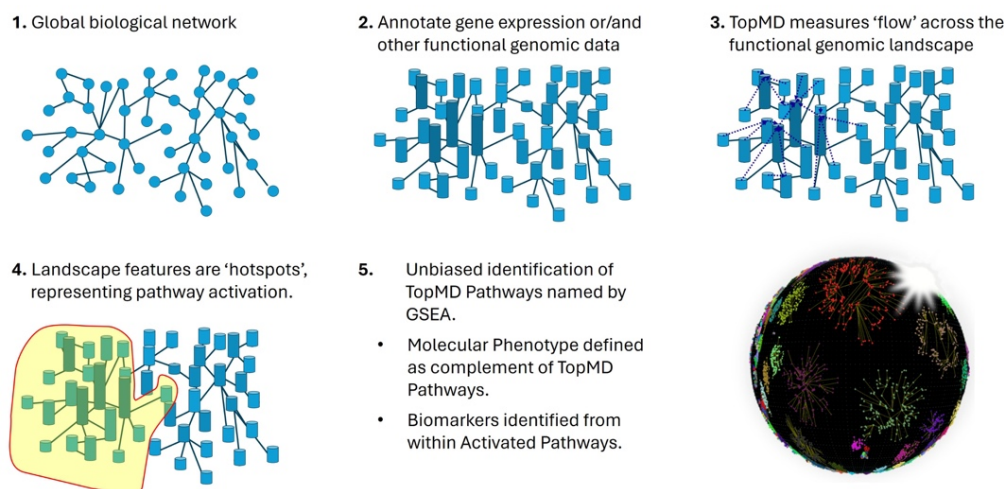

264

265

## 266 Drug interactions mapped by topological analysis

267

268 Due to the power of TopMD analysis we can group genes depending on their  
269 expression values, this means that for each average expression of any cluster of  
270 samples, and even on individual samples, we can extrapolate a tailored gene set of  
271 activated gene-groups for such expression. These gene-groups can be then compared  
272 to other gene sets, as in GSEA, as well against genes activated by specific drugs. To  
273 do so, we utilised the Drug-Gene Interaction Database (26) obtained using genes or  
274 gene products that are known or predicted to interact with drugs, and compared via a  
275 binomial distribution test, the probability that an overlap between such genes and a  
276 TopMD gene-group was random. This was measured using a p-value associated with  
277 binomial statistic, together with other measures, such as the (Bonferroni) adjusted p-  
278 value, a TopMD volume (combining volume of the shape with the statistical  
279 significance of the drug-group combination) as well as an activation value, sum of the  
280 Log2 fold-change of those genes belonging to both the drug associated gene set and  
281 the TopMD group.

282

## 283 Regression

284 Regression analysis was carried out using a Logistic regression model with the  
285 following optimisation problem:

286

$$\min_w C \sum_{i=1}^n s_i (-y_i \log(\hat{p}(X_i)) - (1 - y_i) \log(1 - \hat{p}(X_i))) + r(w)$$

287

288 Where X is the **pathway matrix** and y is the vector of the classification, 0 when the i-  
289 th sample is in the class considered and 1 otherwise. We considered a regularisation  
290 parameter C value of 1. For the penalisation term  $r(w)$  for the regression weights w,  
291 we considered an ElasticNet penalisation with the **l1 ratio** parameter value of 0.5

292

$$\frac{1-\rho}{2} w^T w + \rho \|w\|_1$$

293

294 The probability the i-th sample with **pathways values** equal to  $X_i$  is then:

$$\hat{p}(X_i) = \text{expit}(X_i w + w_0) = \frac{1}{1 + \exp(-X_i w - w_0)}$$

295

296 With  $w_0$  the intercept. The python module used was **scikit-learn (version 1.4.1)** and  
297 the algorithm used LogisticRegression function in the linear\_model submodule.

298

299 We performed a 70/30 balanced split in the data from both cohorts separately (?), with  
300 10 different splits. For each class we performed the regression based on a different  
301 number of pathways, from 1 to 20, ranked in each split separately by their pathway  
302 volume. For each regression model so obtained an average score of both training and  
303 test splits was carried and the best model was selected using a max-min approach,  
304 that is the best model was the one with highest value  $\min(\text{AUC on Train}, \text{AUC on Test})$ ,  
305 to avoid selecting models which were ill-performing on train splits, but instead for  
306 random effects very well on test splits.

307

308

### 309 **Patient Clustering**

310 Pathway volumes were plotted on a PCA using PCAtools (v2.14.0), revealing 3 distinct  
311 clusters, confirmed by K-means clustering, based on pathway activation against  
312 healthy controls. The top ten (10%) of the PCA loadings were then extracted to identify

313 which pathways were driving cluster separation. To analyse differentially activated  
314 pathways between patient clusters, we calculated the average volume, across each  
315 cluster, of each pathway relative to the average of all the COVID-19 patients.

316

317 **Logistic Regression Receiver Operating Characteristic (LRROC) analysis using**  
318 **patient clusters derived from the patient pathway volume matrix.**

319

320 The area under the ROC curve (AUC) is a measure of the model's ability to distinguish  
321 between classes. A higher AUC indicates better discrimination and, consequently,  
322 stronger patient clusters. LRROC for Florence Patients: LRROC analysis was  
323 performed exclusively for Florence patients. The patient pathway volume matrix for  
324 Florence patients was utilized to train the LRROC model. The output consisted of a  
325 Receiver Operating Characteristic (ROC) curve, which depicted the classification  
326 performance of patient clusters based on pathway volume. To evaluate the model's  
327 generalization capability, the dataset was split into training and testing sets, and  
328 separate ROC curves were generated for each.

329

330 Validation of clusters for Liège Patients: The LRROC model trained on Florence  
331 patients was validated on Liège patients' data. Using the trained model, an additional  
332 ROC curve was generated solely for Liège patients to assess the model's performance  
333 in classifying Liège patient clusters based on pathway volume.

334

335

336 **Integration into digital health platform**

337 As a proof of concept, transcriptomics data and TopMD analysis were integrated with  
338 a healthcare platform ran by Comunicare (27). This was to highlight the possibilities of  
339 integrating omics data into healthcare and digital health platforms. Similar regression  
340 analysis of COVID-19 blood transcriptomes, predicting ICU admission, performed  
341 within the DRAGON scope (5) generated a linear model which is currently used to  
342 generate prediction scores between 0 and 1, using TopMD analysis of each sample  
343 submitted. In this way we can present TopMD analysis of individual samples compared  
344 to a healthy baseline, which includes pathway activation information, together with a  
345 similarity score to the ICU admitted average patient we extracted from previous data.

346 **Results:**

347

348 To investigate whether blood transcriptomic analysis coupled with a machine learning  
349 approach underpinned by TopMD could be integrated with clinical data, RNA  
350 sequencing was performed on peripheral blood obtained from 173 patients from Liège  
351 (n=41) and Florence (n=132) gathered under the auspices of the DRAGON  
352 consortium. A summary of the patient characteristics is described in Supplementary  
353 Table 1. Within this cohort ten patients had fatal disease. As no outcome variables  
354 within this cohort had power, an unsupervised approach was undertaken. Out of the  
355 173 patients, 109 patients had matched CT data scored by clinicians. The data is  
356 summarised in Supplementary Table 2. The majority of patients had a CORADS score  
357 of high and very high, where 26% was equivocal, 4.6% low and 2.8% very low. The  
358 CORADS score stands for "COVID-19 Reporting and Data System," which is a  
359 classification system used in radiology to assess the likelihood of COVID-19 infection  
360 based on chest imaging findings, typically on computed tomography (CT) scans. The  
361 score categorizes imaging findings into different levels of suspicion for COVID-19,  
362 ranging from very low to very high.

363

364 *Table 1: Characteristics of 132 patients from Florence included in the study,*  
365 *including lab results at admission.*

| Characteristic                  | N   | N = 132 <sup>†</sup> |
|---------------------------------|-----|----------------------|
| <b>Died</b>                     | 132 |                      |
| <b>N</b>                        |     | 127 (96%)            |
| <b>Y</b>                        |     | 5 (3.8%)             |
| <b>Age</b>                      | 132 | 60 (50, 68)          |
| <b>Sex</b>                      | 132 |                      |
| <b>F</b>                        |     | 40 (30%)             |
| <b>M</b>                        |     | 92 (70%)             |
| <b>Non-invasive ventilation</b> | 132 |                      |

|                                               |           |
|-----------------------------------------------|-----------|
| <b>N</b>                                      | 123 (93%) |
| <b>Y</b>                                      | 9 (6.8%)  |
| <b>Continuous positive airway pressure</b>    | 132       |
| <b>N</b>                                      | 129 (98%) |
| <b>Y</b>                                      | 3 (2.3%)  |
| <b>Tracheostomy</b>                           | 132       |
| <b>N</b>                                      | 131 (99%) |
| <b>Y</b>                                      | 1 (0.8%)  |
| <b>High flow nasal cannula oxygen therapy</b> | 132       |
| <b>N</b>                                      | 105 (80%) |
| <b>Y</b>                                      | 27 (20%)  |
| <b>Hypertension</b>                           | 132       |
| <b>N</b>                                      | 77 (58%)  |
| <b>Y</b>                                      | 55 (42%)  |
| <b>Malnutrition</b>                           | 132       |
| <b>N</b>                                      | 131 (99%) |
| <b>Y</b>                                      | 1 (0.8%)  |
| <b>Cardiovascular disease</b>                 | 132       |
| <b>N</b>                                      | 119 (90%) |
| <b>Y</b>                                      | 13 (9.8%) |
| <b>Respiratory disease</b>                    | 132       |
| <b>N</b>                                      | 118 (89%) |
| <b>Y</b>                                      | 14 (11%)  |

|                                         |     |                      |
|-----------------------------------------|-----|----------------------|
| <b>Cancer</b>                           | 132 |                      |
| <b>N</b>                                |     | 118 (89%)            |
| <b>Y</b>                                |     | 14 (11%)             |
| <b>Chronic kidney disease</b>           | 132 |                      |
| <b>N</b>                                |     | 130 (98%)            |
| <b>Y</b>                                |     | 2 (1.5%)             |
| <b>Chronic hepatitis</b>                | 132 |                      |
| <b>N</b>                                |     | 130 (98%)            |
| <b>Y</b>                                |     | 2 (1.5%)             |
| <b>Cerebrovascular disease</b>          | 132 |                      |
| <b>N</b>                                |     | 125 (95%)            |
| <b>Y</b>                                |     | 7 (5.3%)             |
| <b>Chronic hematologic disease</b>      | 132 |                      |
| <b>N</b>                                |     | 129 (98%)            |
| <b>Y</b>                                |     | 3 (2.3%)             |
| <b>Diastolic blood pressure (mmHg)</b>  | 132 | 79 (70, 85)          |
| <b>Heart rate (BPM)</b>                 | 130 | 80 (75, 89)          |
| <b>Systolic blood pressure (mmHg)</b>   | 132 | 125 (115, 140)       |
| <b>Temperature (°C)</b>                 | 131 | 36.50 (36.00, 37.20) |
| <b>Weight (kg)</b>                      | 128 | 78 (70, 89)          |
| <b>Height (cm)</b>                      | 126 | 170 (165, 175)       |
| <b>Alanine aminotransferase (U/L)</b>   | 128 | 27 (17, 39)          |
| <b>Aspartate aminotransferase (U/L)</b> | 64  | 31 (24, 46)          |

|                                               |     |                      |
|-----------------------------------------------|-----|----------------------|
| <b>Bilirubin (mg/dL)</b>                      | 128 | 0.50 (0.30, 0.60)    |
| <b>Calcium (mg/dL)</b>                        | 96  | 4.50 (4.34, 4.63)    |
| <b>Creatinine (mg/dL)</b>                     | 130 | 0.83 (0.73, 0.95)    |
| <b>D-dimer (ng/mL)</b>                        | 91  | 728 (429, 1,091)     |
| <b>Direct bilirubin (mg/dL)</b>               | 44  | 0.25 (0.17, 0.29)    |
| <b>Fibrinogen (mg/dL)</b>                     | 117 | 572 (446, 654)       |
| <b>Fraction of inspired oxygen (%)</b>        | 127 | 28 (21, 36)          |
| <b>Hematocrit (%)</b>                         | 132 | 42.7 (39.7, 45.8)    |
| <b>Lactate dehydrogenase (U/L)</b>            | 118 | 297 (247, 359)       |
| <b>Lactic acid (mg/dL)</b>                    | 102 | 9.0 (7.0, 11.9)      |
| <b>Leukocytes (10<sup>9</sup>/L)</b>          | 132 | 6.2 (4.6, 7.7)       |
| <b>Lymphocytes (10<sup>9</sup>/L)</b>         | 129 | 0.90 (0.68, 1.25)    |
| <b>Neutrophils (10<sup>9</sup>/L)</b>         | 129 | 4.67 (3.08, 6.16)    |
| <b>Oxygen saturation (%)</b>                  | 109 | 96.10 (94.20, 97.70) |
| <b>Partial pressure oxygen (mmHg)</b>         | 131 | 74 (65, 87)          |
| <b>Partial pressure carbon dioxide (mmHg)</b> | 127 | 36.2 (34.0, 39.0)    |
| <b>Platelets (10<sup>9</sup>/L)</b>           | 132 | 196 (156, 255)       |
| <b>Potassium (mmol/L)</b>                     | 128 | 3.85 (3.50, 4.10)    |
| <b>Procalcitonin (ug/L)</b>                   | 126 | 0.09 (0.06, 0.15)    |
| <b>Prothrombin time (seconds)</b>             | 127 | 13.00 (12.30, 13.70) |
| <b>Sodium (mmol/L)</b>                        | 129 | 137 (135, 140)       |
| <b>Urea nitrogen (g/L)</b>                    | 64  | 30 (30, 50)          |
| <b><sup>†</sup> n (%); Median (IQR)</b>       |     |                      |



### 367 **Patients form 3 clusters based on their pathway activation**

368

369 The RNA sequencing data was used to derive gene expression data (mRNA  
370 identification and abundance) which was calculated using Salmon inferred with  
371 Tximport in R, where values were converted into log2 counts per million (cpm). TopMD  
372 was then employed to calculate the activation of pathways. To identify differences in  
373 pathway activation across the cohort, activation data was plotted on a PCA which  
374 revealed three distinct clusters of patients (Figure 1). The relationship between clinical  
375 observations, demographics and CT scan data in each cluster was explored, and the  
376 significant differences are reported in Table 3. Lactic acid was slightly higher in cluster  
377 1 and 2 and lower in cluster 3. A higher proportion of respiratory disease was observed  
378 in cluster 2 and the fraction of inspired oxygen was also higher in this cluster. Direct  
379 bilirubin was also higher in cluster 2. The majority of those that died from COVID-19  
380 were in cluster 2. CORADS scoring was unable to distinguish between the clusters at  
381 a molecular level.

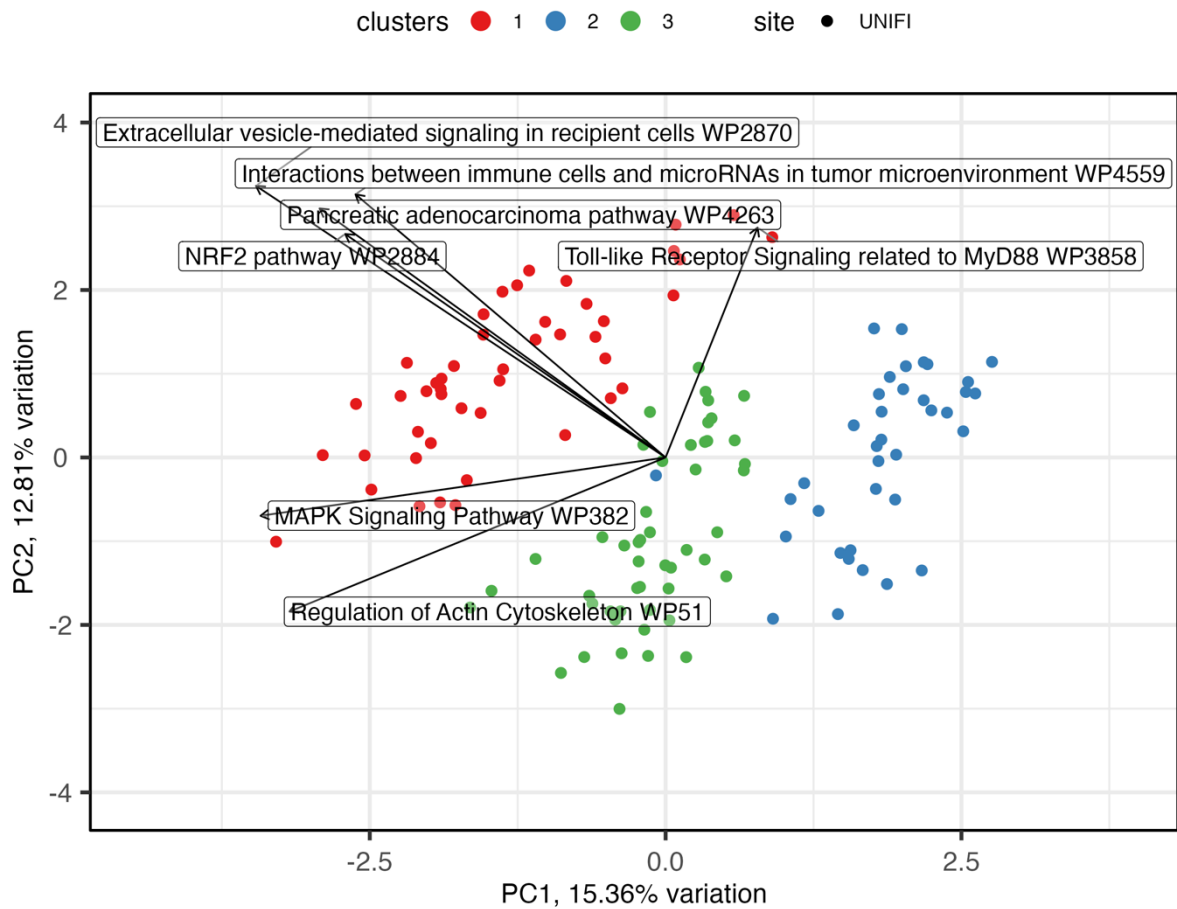

382

383 *Figure 1: TopMD pathway volumes of each patient in the Florence cohort, calculated*  
384 *from a healthy plotted as a PCA plot. The data reveals three distinct clusters based on*  
385 *pathway activation determined by kmeans.*

386 *Table 2: Patient characteristics that differ between the three clusters in the Florence*  
 387 *cohort (p = <0.05).*

| <b>Characteristic</b>                  | <b>N</b> | <b>1, N = 46<sup>1</sup></b> | <b>2, N = 37<sup>1</sup></b> | <b>3, N = 49<sup>1</sup></b> | <b>p-value<sup>2</sup></b> |
|----------------------------------------|----------|------------------------------|------------------------------|------------------------------|----------------------------|
| <b>Lactic acid (mg/dL)</b>             | 102      | 10.0 (7.7, 13.0)             | 10.0 (7.2, 12.0)             | 8.0 (5.3, 9.7)               | 0.008                      |
| <b>Fraction of inspired oxygen (%)</b> | 127      | 28 (21, 36)                  | 32 (27, 40)                  | 28 (21, 29)                  | 0.019                      |
| <b>Died</b>                            | 132      |                              |                              |                              | 0.032                      |
| N                                      |          | 46 (100%)                    | 33 (89%)                     | 48 (98%)                     |                            |
| Y                                      |          | 0 (0%)                       | 4 (11%)                      | 1 (2.0%)                     |                            |
| <b>Respiratory disease</b>             | 132      |                              |                              |                              | 0.042                      |
| N                                      |          | 44 (96%)                     | 29 (78%)                     | 45 (92%)                     |                            |
| Y                                      |          | 2 (4.3%)                     | 8 (22%)                      | 4 (8.2%)                     |                            |
| <b>Direct bilirubin (mg/dL)</b>        | 44       | 0.20 (0.17, 0.27)            | 0.28 (0.24, 0.32)            | 0.20 (0.17, 0.28)            | 0.047                      |

<sup>1</sup> n (%); Median (IQR)

<sup>2</sup> Fisher's exact test; Kruskal-Wallis rank sum test; Pearson's Chi-squared test

388

389 Molecular phenotype, Cluster 1, was characterised by high activation of pathways  
 390 associated with ESC pluripotency, NRF2, and TGF-β receptor signalling (Figure 2).

391 Molecular phenotype, Cluster 2 displayed high activation of pathways including focal  
 392 adhesion-PI3K-Akt-mTOR signalling and type I interferon induction and signalling,  
 393 while Cluster 3 exhibited low IRF7-related pathway activation.

394

395 LRROC analysis was conducted on models trained using 70% of patients from the  
396 Florence cohort, with test results evaluated on the remaining 30% of the Florence  
397 cohort. The area under the ROC curve (AUCROC) values were found to be 0.84, 0.85,  
398 and 0.72 for clusters Cluster 1, Cluster 2, and Cluster 3, respectively. Subsequently,  
399 these clusters were validated in the Liège cohort (Supplementary Figure 1), yielding  
400 AUCROC values of 0.76, 0.93, and 0.69 for Cluster 1, Cluster 2, and Cluster 3,  
401 respectively (Supplementary Figure 2).

402

403

#### 404 **Potential drug candidates are identified for each cluster**

405 To identify potential drug candidates that modulate pathways identified in these  
406 patient clusters, TopMD pathway activation was mapped onto the Drug-Gene  
407 Interaction Database (Figure 3). This mapping revealed distinct drug targets for each  
408 cluster, detailed in the supplementary table 4. This approach has a two-fold benefit:  
409 informing potential clinical trials and informing underlying biological mechanisms  
410 specific to each cluster. Interestingly, the pattern of pathway activation might also  
411 provide insight into the potential benefits or drawbacks of specific therapies,  
412 considering a drug's mechanism of action.

413 While all clusters shared targetable pathways led by genes such as ITGB2, GNAS,  
414 and CXCR2, unique targets also emerged. Cluster 1 specifically identified IFNAR1,  
415 TGFBR2, and CSF2RB, while cluster 2 added SERPING1 and TLN1. Notably, cluster  
416 3 shared SERPING1 with cluster 2. These findings highlight both commonalities and  
417 variations in potential therapeutic targets across the identified patient clusters.

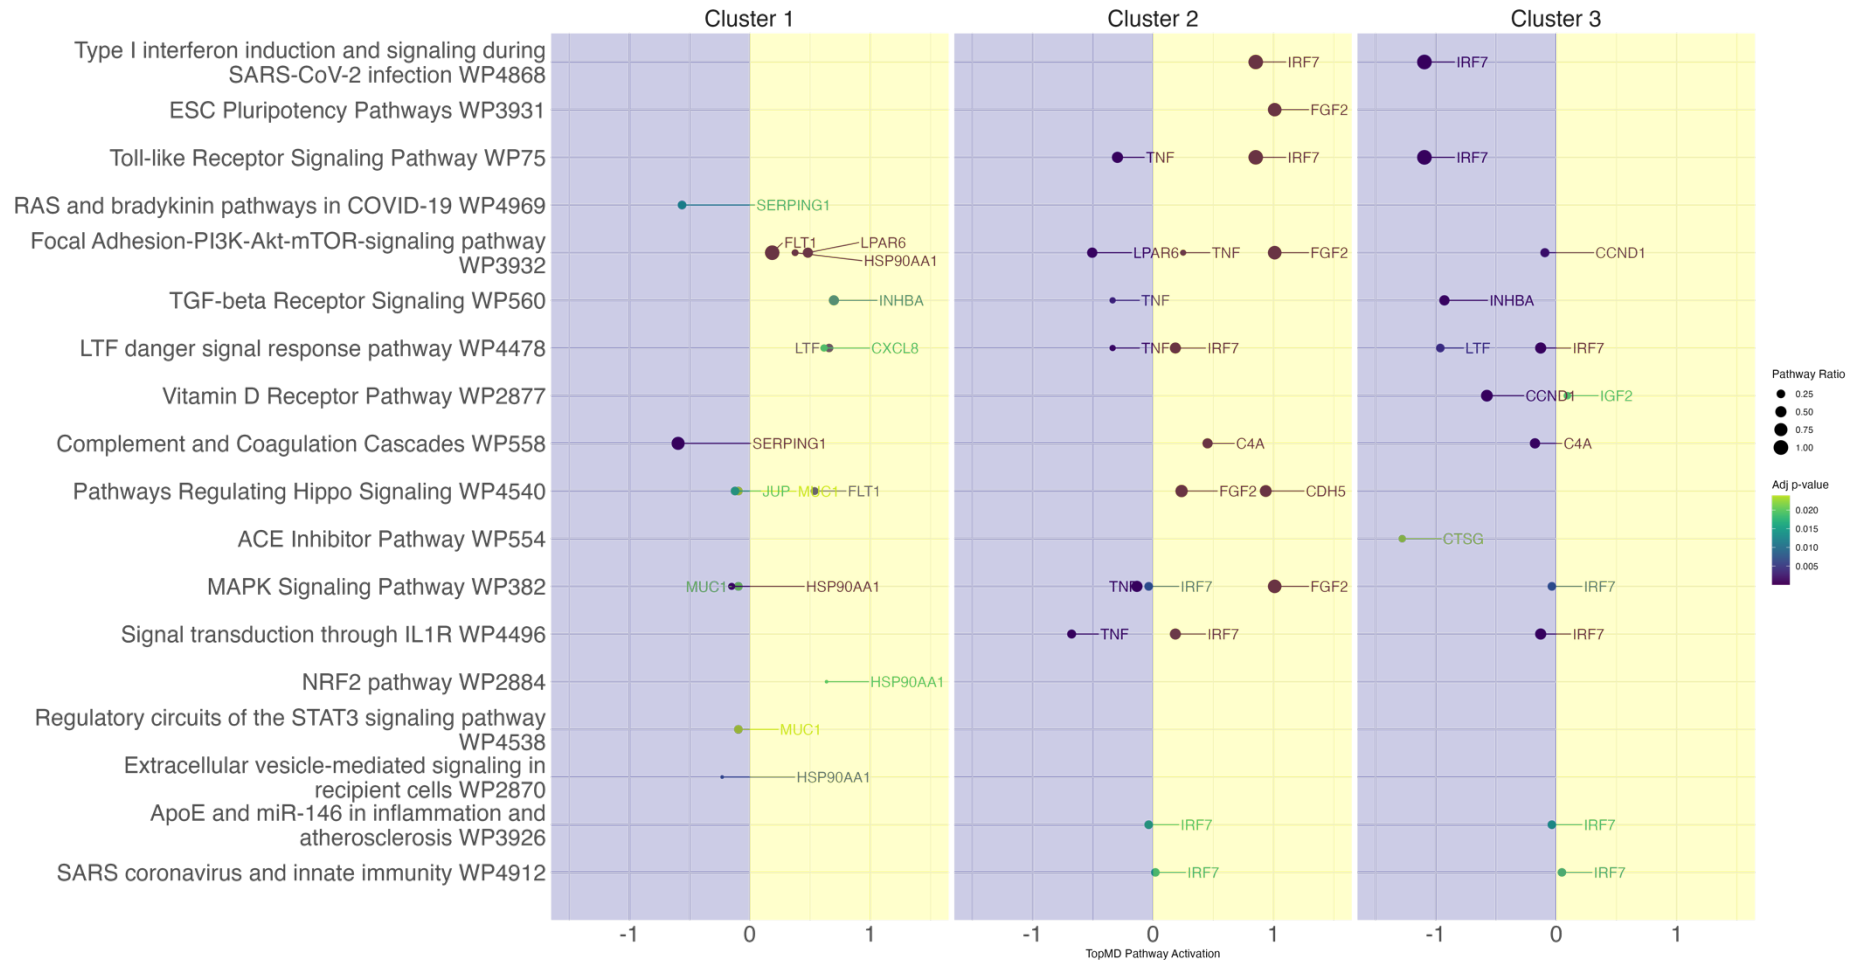

418

419 *Figure 2: The average pathway volume for each cluster was considered in a TopMD enrichment analysis against the average pathway*  
 420 *activation for the whole cohort to identify differentially activated pathways. The enrichment analysis was filtered by adjusted P value,*  
 421 *then the top pathways were plotted. The pathways are annotated with the gene that leads the identified pathway. The dots are*  
 422 *coloured by adjusted p-value and the size represents the proportion of genes identified within that pathway from TopMD analysis.*

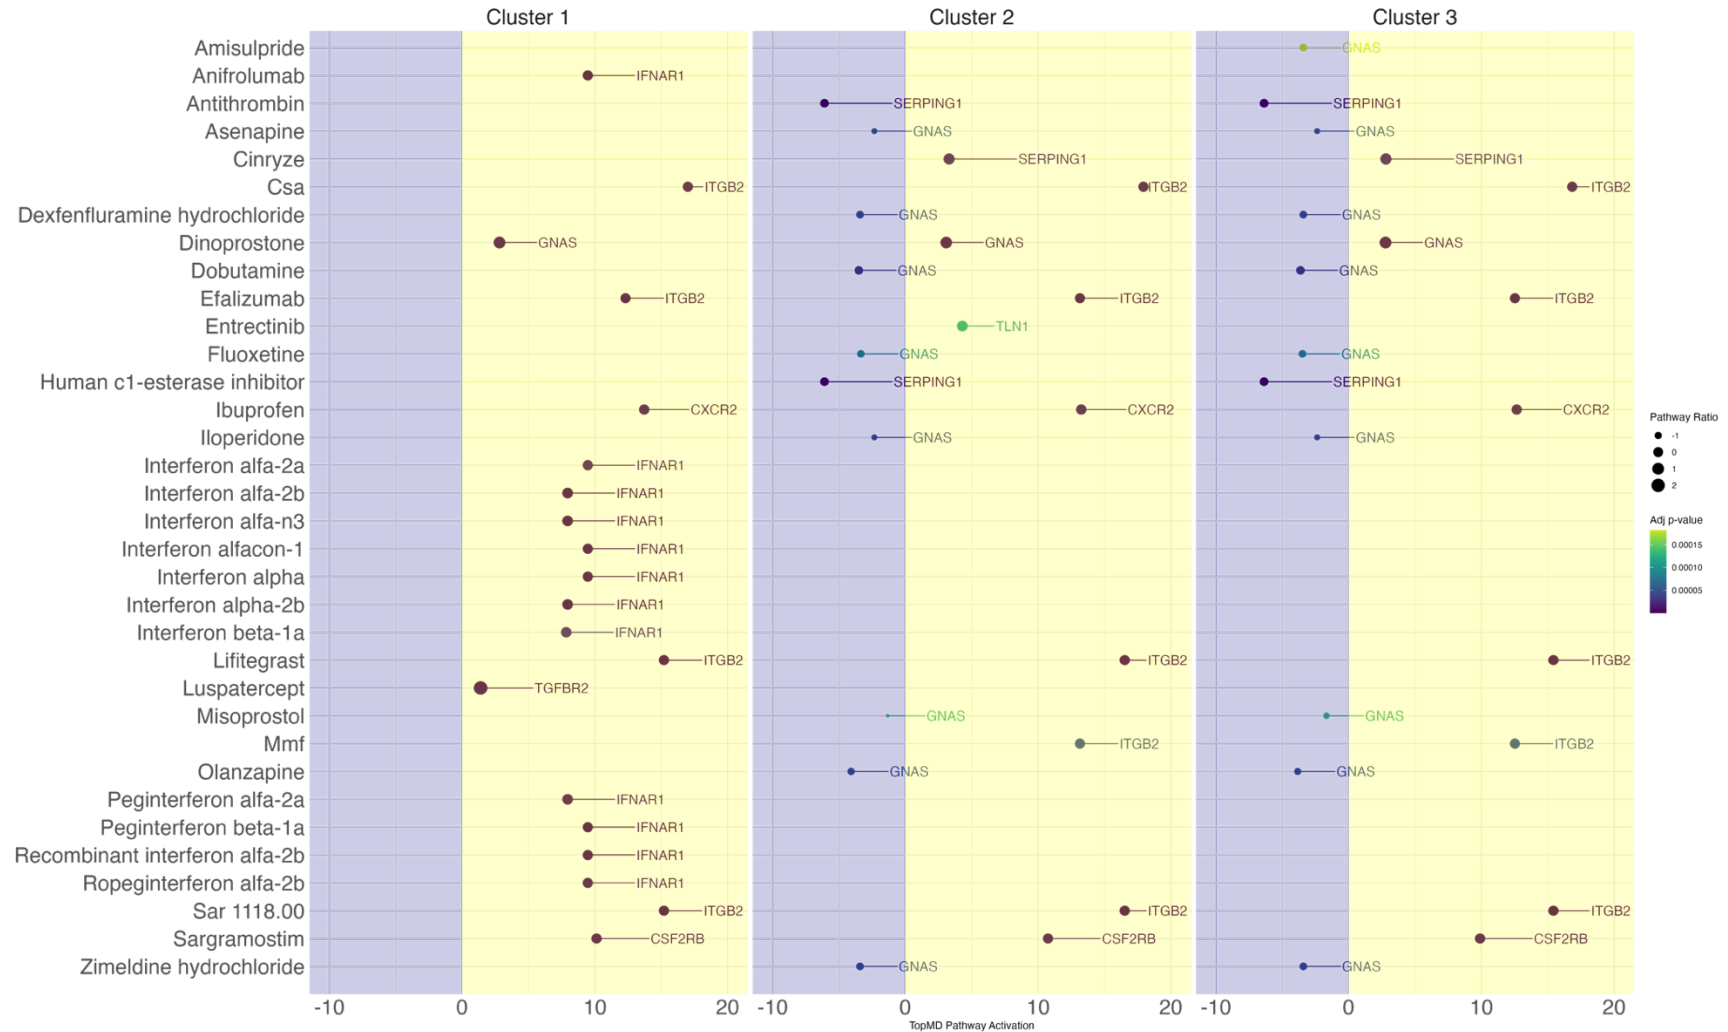

423  
 424 *Figure 3: TopMD enrichment analysis was mapped against the Drug-Gene Interaction Database, using a healthy baseline, revealing*  
 425 *approved drugs that are known to target genes and their corresponding pathways. The top drug candidates are plotted based on*  
 426 *adjusted p-value and pathway volume.*

427 **Identification of pathways in fatal cases where intervention might**  
428 **promote survival**

429 Due to limited sample size, we focused on the unsupervised analysis; however, to  
430 show utility of investigating pathway activity in individuals, pathway analysis in the 10  
431 deceased patients from the Florence and Liège cohort were observed. Unsurprisingly,  
432 these patients exhibited advanced age and high comorbidity rates (cardiovascular:  
433 70%, respiratory: 50%, malnutrition: 40%, hypertension: 90%, cerebrovascular: 30%,  
434 chronic hepatitis: 40%). Interestingly, all 10 patients displayed a strong signal for  
435 "nonalcoholic fatty liver disease" driven by the NDUFA9 and UQCRC2 genes (Figure  
436 4).

437 Despite this shared pathway, individual analysis revealed heterogeneity among  
438 deceased patients, highlighting the complex interplay between COVID-19,  
439 comorbidities, and individual demographics on pathway activation.

440 Enrichment analysis identified potential therapeutic targets based on individual  
441 pathway activation. All patients displayed potential targets including CXCR2 (Figure  
442 5). Additionally, specific druggable pathways were identified for some patients,  
443 including GNAS (multiple patients), ITGB2 (patients 2 & 6), CSF2RB (multiple  
444 patients), SERPING1 (5 patients), PIK3CD (patient 5), TGFBR2 (patient 9), and  
445 CUL4B (patient 10).

446

447

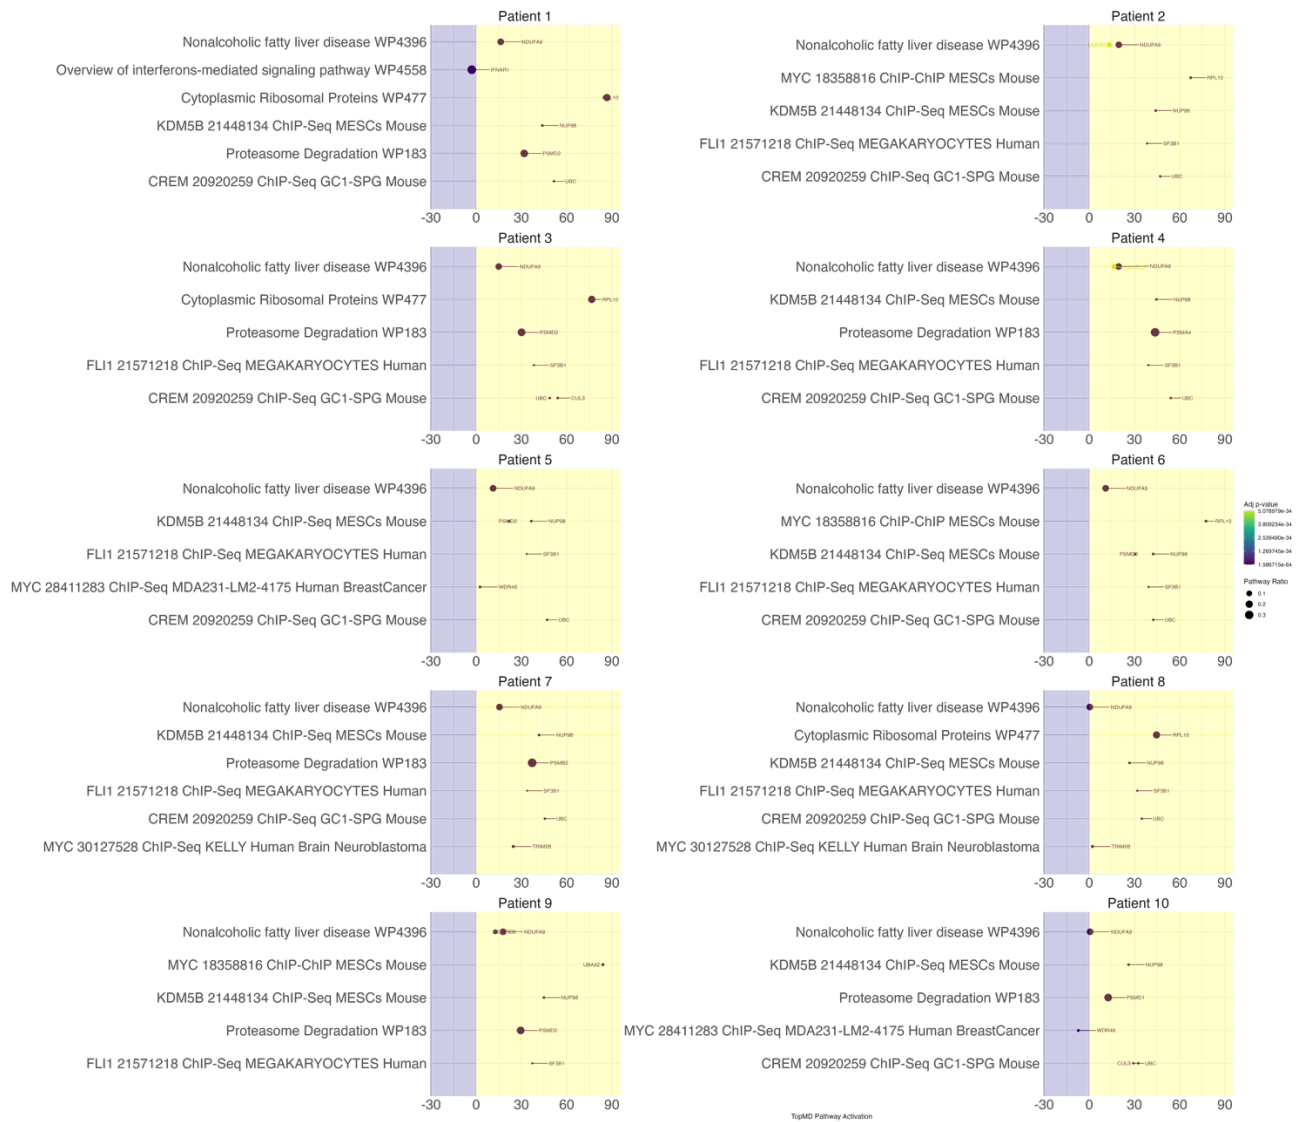

448

449

450 *Figure 4: The top 6 pathways enriched in fatal cases within the Florence and Liège*

451 *cohort using a healthy baseline.*

452

453

454

455

456

457

458

459

460

461



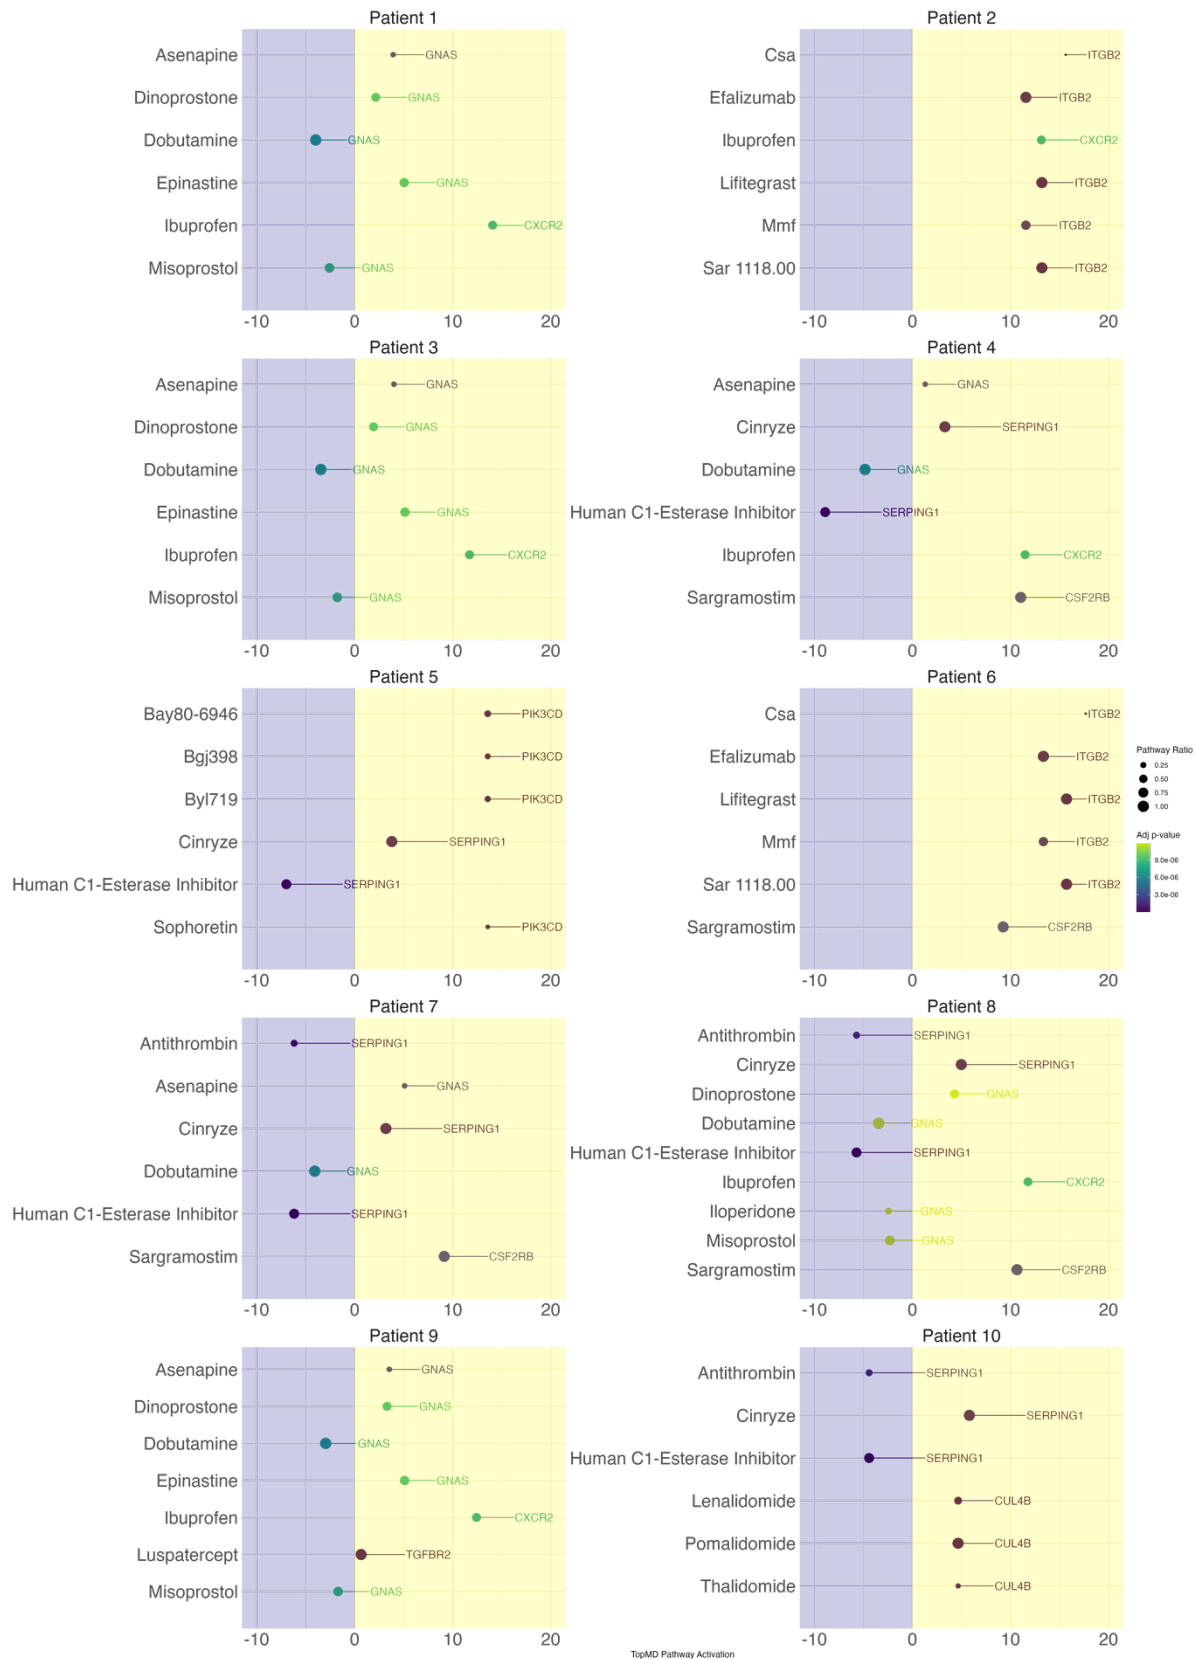

462

463 *Figure 5: The top significant drug candidates and peak genes that could potentially*  
 464 *modulate the phenotype of the 10 fatal cases patients in the Florence and Liège*  
 465 *cohort.*

466

467

468 **Discussion:**

469 Traditionally, molecular phenotyping requires data reduction and feature selection,  
470 removing biological and technical ‘noise’, prior to pathway enrichment analysis, but  
471 this leads to results which do not accurately represent the molecular phenotypes.  
472 Topological analysis of global gene expression finds value in the low abundance  
473 transcripts usually discarded as noise, as they represent the ‘foothills’ of largely  
474 activated pathways in a comprehensive molecular landscape. By understanding the  
475 molecular phenotype, it is possible to achieve more successful selection of  
476 therapeutics, as medicines work at the molecular level as opposed to a clinical level  
477 (28).

478

479 To redefine predictive models for patient outcomes and health trajectories, there is a  
480 growing recognition of the importance of integrating complex datasets. This ranges  
481 from biomarkers, clinical parameters to CT scans. For instance, a fully automated AI  
482 framework was developed to extract features from chest CT scans for diagnosing  
483 COVID-19. The model achieved 85.18% accuracy, enabling rapid and accurate  
484 differentiation of COVID-19 from routine clinical conditions, facilitating timely  
485 interventions and isolation procedures (29). Similarly, an AI-based analysis named  
486 CACOVID-CT was implemented to automatically assess disease severity on chest CT  
487 scans. Retrospective analysis of 476 patients revealed that quantitative  
488 measurements, such as the percentage of affected lung area (% AA) and CT severity  
489 score (CT-SS), correlated strongly with hospital length of stay, ICU admission,  
490 mechanical ventilation, and in-hospital mortality. This tool proved effective in  
491 identifying patients at higher risk of severe outcomes, facilitating patient management  
492 and relieving the workload of radiologists (30).

493

494 Our study identified three distinct molecular phenotypes of COVID-19 molecular  
495 through topological analysis of global blood gene expression. LRROC analysis  
496 demonstrated strong discriminative power of the defined patient clusters tested in the  
497 Florence and validated in the Liège cohort. This revealed insights into underlying  
498 disease mechanisms, potentially guiding personalised therapeutic approaches.

499

500 The analysis using the TopMD algorithm assigned patients to three clusters. Some of  
501 the clinical observations aligned with the defined clusters, including lactic acid

502 elevation in cluster 1 and 2 compared to cluster 3. Elevated lactic acid is known to be  
503 associated with disease severity and mortality (31). Similarly, cluster 2 showed a  
504 higher proportion of respiratory disease and required a higher fraction of inspired  
505 oxygen. Additionally, this cluster exhibited elevated direct bilirubin, another potential  
506 indicator of disease severity (32). Notably, the majority of those that died from COVID-  
507 19 were in cluster 2 (n=4), although the overall number of fatalities in this cohort was  
508 small (n=5).

509

510 Interestingly, the CORADS scoring system used for chest X-ray/CT severity  
511 assessment, couldn't differentiate between the molecular clusters. This suggests  
512 different molecular mechanisms might underlie similar clinical presentations, which  
513 cannot be identified by CT scan. However, utilising higher resolution CT scan data,  
514 such as continuous scoring systems offered by tools like Thirona, might provide more  
515 granular insights compared to the categorical data used in this study (30).

516

517 Molecular differences were examined between each cluster by considering statistically  
518 significant GSEA pathways with highest TopMD pathway volumes (Fig. 2). Cluster 1  
519 displayed a reduction in pathways related to the renin-angiotensin system (RAS) and  
520 bradykinin, implicated in COVID-19 pathogenesis (33). Additionally, an increase in  
521 focal adhesion pathways, possibly indicating cellular changes related to tissue repair  
522 and remodelling. Activation of the complement cascade, led by SERPING1, indicates  
523 involvement in the immune response to the virus. Furthermore, an increase in the  
524 TGF- $\beta$  pathway, which regulates inflammation and tissue repair was also identified.  
525 Additionally, a high activation of pathways associated with ESC pluripotency, NRF2,  
526 and TGF- $\beta$  receptor signalling. The ESC pluripotency pathway is implicated in tissue  
527 repair and regeneration, suggesting a potential compensatory response to tissue  
528 damage caused by the virus. NRF2 pathway activation may indicate an antioxidant  
529 response to counteract oxidative stress induced by viral infection (34). TGF- $\beta$  receptor  
530 signalling, known for its role in regulating inflammation and fibrosis, may contribute to  
531 tissue remodelling and fibrosis observed in severe COVID-19 cases (35). Also, cluster  
532 1 exhibits low activation of pathways related to extracellular vesicle-mediated  
533 signalling and complement and coagulation cascades. The decrease in extracellular  
534 vesicle-mediated signalling may reflect impaired intercellular communication, while the

535 low activation of complement and coagulation cascades suggests a possible  
536 dysregulated immune response and coagulopathy (36).

537

538 In cluster 2, high activation of pathways such as focal adhesion-PI3K-Akt-mTOR  
539 signalling and type I interferon induction and signalling was observed, and has been  
540 proposed as a potential therapeutic target in SARS-CoV-2 (37, 38) and MERS-CoV  
541 (39). Focal adhesion pathway activation may indicate cellular responses to tissue  
542 injury or viral invasion, while type I interferon induction and signalling reflect a strong  
543 antiviral immune response (40). In contrast, cluster 3 shows opposite activity in IRF7-  
544 related pathways compared to 2. Additionally, vitamin D receptor activity was  
545 observed, which has been implicated in modulating the immune response and may  
546 play a role in COVID-19 severity (41-43). Notably, this cluster exhibited low activation  
547 of pathways related to TGF- $\beta$  receptor signalling, IL1R signalling, and LTF danger  
548 signal response. The reduced TGF- $\beta$  receptor signalling suggests decreased fibrotic  
549 response and tissue remodelling, while low IL1R signalling may indicate attenuated  
550 inflammation (44). The activation of the LTF danger signal response pathway appears  
551 to be diminished. Lactoferrin demonstrates antiviral capabilities against various  
552 viruses, including coronaviruses (45). It can impede viral replication, disrupt viral  
553 attachment and entry, and adjust host immune responses. Lactoferrin's  
554 immunomodulatory attributes might aid in tempering excessive inflammation and  
555 alleviating cytokine storms observed in severe cases of COVID-19 (46). The  
556 decreased activation of the LTF danger signal response pathway could potentially  
557 contribute to a weakened interferon response (47).

558

559 The stratified molecular phenotypes were found to have different expected responses  
560 to both medicines used, and medicines not yet used for COVID-19 (Fig. 3). In cluster  
561 1, CSA or cyclosporine has been shown to be safe to use during COVID-19 for the  
562 intended use, however, a reduction in hyperinflammation was observed (48). This  
563 warrants further investigation as highlighted by others (49). Interferon related therapies  
564 that could modulate the pathway activation of cluster 1 were also identified, which have  
565 been shown to have positive effects (50-52). Lifitegrast inhibits SARS-CoV-2 *in vitro*  
566 (53, 54) By inhibiting TGF- $\beta$  signalling, Luspatercept may help mitigate the excessive  
567 inflammatory response and tissue damage seen in severe COVID-19 cases. Similarly,

568 Sargramostim has shown promise in a small study, but larger trials are needed to  
569 confirm these findings (55).

570

571 Like, cluster 1, CSA was also identified as a potentially effective treatment for clusters  
572 2 & 3. The mechanisms of actions of other medicines only matched the molecular  
573 phenotype of cluster 2. Asenapine, an anti-psychotic drug identified by others as a  
574 potential drug candidate for COVID-19 (56, 57) Cinryze a human c1 esterase inhibitor  
575 was also identified, these inhibitors have been shown to improve lung computed  
576 tomography scores and increase blood eosinophils, which are indicators of disease  
577 recovery, however, time to clinical improvement was not observed (58). Also, for  
578 cluster 2, we identified Fluoxetine and other SSRIs such as fluvoxamine which has  
579 previously been identified as having potential use for the treatment of COVID-19 and  
580 long-COVID (59) Amisulpride was also identified in cluster 3.

581

582 To further evaluate the utility of the TopMD algorithm for precision medicine,  
583 enrichment analysis was performed on individual data from the 10 fatal cases within  
584 the Florence and Liège cohorts. This approach highlights pathway activation specific  
585 to each patient, bypassing the need for a whole cohort for deconvolution. All 10  
586 patients showed potential therapeutic targets based on pathway enrichment. CXCR2  
587 and GNAS were commonly activated across patients (Figure 5), suggesting drugs  
588 such as Ibuprofen may be able to modulate some pathways associated with their  
589 phenotype. For patients 2 and 6, ITGB2 emerged as one of the top druggable  
590 pathways. Notably, Lifitegrast has shown to inhibit SARS-CoV-2 *in vitro* (53, 54).  
591 Additionally, CSA or cyclosporine, was also identified, which was another compound  
592 identified in the cluster analysis.

593

594 Multiple patients exhibited CSF2RB enrichment, indicating potential for Sargramostim,  
595 a drug shown to reduce mortality and incubation in small COVID-19 study (55).  
596 SERPING1 enrichment in 5 patients suggests various approved drugs for pathway  
597 modulation, including antithrombin, human c1 esterase inhibitor and cinryze. Patient  
598 specific findings were also observed. PIK3CD enrichment in patient 5 suggests  
599 Sophoretin as a potentially modulator, with a meta-analysis showing quercetins  
600 (including sophoretin), reduce LDH, hospitalisation risk and mortality (60). Patient 9  
601 displayed TGFBR2 enrichment indicating luspatercept as a potential drug (identified

602 in the cluster analysis) as a potential candidate. Lastly, CUL4B enrichment in patient  
603 10, suggests Thalidomide, Pomalidomide, Lenalidomide for pathway modulation.  
604 While Lenalidomide, used to manage multiple myelomas, has been proposed as  
605 protective against severe COVID-19 in a case report (61) a clinical trial showed no  
606 benefit (62). Thalidomide, although showing no benefit itself (62), remains a subject of  
607 discussion for its potential use in COVID-19 (63).

608

609 As a proof of concept, TopMD models were integrated into the Comunicare platform  
610 (27), a tool developed and configured within the framework of the DRAGON project,  
611 aimed at patient empowerment and providing disease management tooling for  
612 clinicians and patients. This proof of concept also enables the analysis of clinical data  
613 for clinicians in a dedicated dashboard to demonstrate the possibilities of  
614 transcriptomics in digital health. As an example, we generated a model that predicts  
615 ICU admission based on our previous work (5) as other outcome variables were too  
616 low in number. If a clinician has access to transcriptomic data, a csv file can be  
617 uploaded to the dashboard and in return activated pathways are returned after running  
618 analysis on the TopMD API. While the use of transcriptomics at the bedside is not  
619 ready for deployment, we propose that it is a major advance to be able to demonstrate  
620 integration of this data into digital health platforms as the growth of precision medicine  
621 continues.

622

623 This study identified three distinct molecular phenotypes in hospitalised COVID-19  
624 patients, which were not associated with differences in CT scans and clinical  
625 observations. However, these molecular phenotypes match the mechanism of action  
626 of different medicines, providing the opportunity for biomarker-led stratified medicine.  
627 Topological analysis of global gene expression to define a patient's pathway activation  
628 map could be useful in future pandemics to aid in treatment decisions before clinical  
629 trials can be completed.

630

631 **Funding:**

632 TopMD, the University of Southampton, Imperial College London, CDISC,  
633 Comunicare Solutions, University Hospital of Liège (CHU Liège), and the University of  
634 Liverpool are members of the DRAGON consortium. The DRAGON project has  
635 received funding from the Innovative Medicines Initiative 2 Joint Undertaking (JU)  
636 under grant agreement No 101005122. The JU receives support from the European  
637 Union's Horizon 2020 research and innovation program and EFPIA. This publication  
638 reflects the author's view. Neither IMI nor the European Union, EFPIA or the DRAGON  
639 consortium, are responsible for any use that may be made of the information contained  
640 therein. JAH, TP, RPR and CH were supported by the US Food and Drug  
641 Administration Medical Countermeasures Initiative (no 75F40120C00085) awarded to  
642 JAH and work was also supported by the MRC funded MR/Y004205/1 'The G2P2  
643 virology consortium'. The funders had no role in study design, data collection and  
644 analysis, decision to publish, or preparation of the manuscript. DB is funded by NIHR  
645 and MRC.

646

647 **Acknowledgments:**

648 The authors wish to thank the study participants and the hospital staff for their  
649 participation in this study.

650

651 **Contributions:**

652 RPR, FS: methodology, RPR, FS: visualisation, RPR, FS, BVE, TK: software, BE:  
653 project administration, RPR, FS, JG, MH, AS, EG, AFD, LG, AJP, CN: investigation,  
654 RPR, FS, JG, CH, TP, SW: formal analysis, JG, CN: clinical supervision, RPR, FS,  
655 AJP, ST, RB, KH, XX, YN, SW: data curation, RPR, FS, EP, PS, JAH, JPS: writing -  
656 original draft preparation, RPR, FB, BE, BE, JG, MH, AS, EG, AFD, LG, AJP, CN, ST,  
657 RB, KH, CH, TP, RD, TC, DB, SW, XX, YN, SW, SW, GY, PJS, JAH, JPRS: writing -  
658 review and editing, JPRS, JAH, PJS, GY, SW: funding acquisition

659

660 **Declarations:**

661 RPR is an employee at TopMD Precision Medicine Ltd. JPRS is a founding director,  
662 CEO, employee, and shareholder in TopMD Precision Medicine Ltd. FS is a founding  
663 director, CTO, employee, and shareholder in TopMD Precision Medicine Ltd. PS is a



664 founding director, employee, and shareholder in TopMD Precision Medicine Ltd. BVE  
665 is CEO of Comunicare Solutions. TK is CTO of Comunicare Solutions.

666 **Data availability:**

667

668 Sequencing reads available under SRA bioproject: PRJNA1085259

669 **References:**

- 670 1. Clark JJ, Penrice-Randal R, Sharma P, Kipar A, Dong X, Pennington SH, et  
671 al. Sequential infection with influenza A virus followed by severe acute respiratory  
672 syndrome coronavirus 2 (SARS-CoV-2) leads to more severe disease and  
673 encephalitis in a mouse model of COVID-19. *bioRxiv*. 2023:2020.10.13.334532.
- 674 2. De Neck S, Penrice-Randal R, Clark JJ, Sharma P, Bentley EG, Kirby A, et al.  
675 The Stereotypic Response of the Pulmonary Vasculature to Respiratory Viral  
676 Infections: Findings in Mouse Models of SARS-CoV-2, Influenza A and  
677 Gammaherpesvirus Infections. *Viruses* [Internet]. 2023; 15(8).
- 678 3. Dorward DA, Russell CD, Um IH, Elshani M, Armstrong SD, Penrice-Randal  
679 R, et al. Tissue-Specific Immunopathology in Fatal COVID-19. *Am J Respir Crit Care*  
680 *Med*. 2021;203(2):192-201.
- 681 4. Legebeke J, Lord J, Penrice-Randal R, Vallejo AF, Poole S, Brendish NJ, et  
682 al. Evaluating the Immune Response in Treatment-Naive Hospitalised Patients With  
683 Influenza and COVID-19. *Front Immunol*. 2022;13:853265.
- 684 5. Penrice-Randal R, Dong X, Shapanis AG, Gardner A, Harding N, Legebeke J,  
685 et al. Blood gene expression predicts intensive care unit admission in hospitalised  
686 patients with COVID-19. *Front Immunol*. 2022;13:988685.
- 687 6. Russell CD, Valanciute A, Gachanja NN, Stephen J, Penrice-Randal R,  
688 Armstrong SD, et al. Tissue Proteomic Analysis Identifies Mechanisms and Stages  
689 of Immunopathology in Fatal COVID-19. *Am J Respir Cell Mol Biol*. 2021.
- 690 7. Liu X, Speranza E, Muñoz-Fontela C, Haldenby S, Rickett NY, Garcia-Dorival  
691 I, et al. Transcriptomic signatures differentiate survival from fatal outcomes in  
692 humans infected with Ebola virus. *Genome Biology*. 2017;18(1):4.
- 693 8. McClain MT, Constantine FJ, Nicholson BP, Nichols M, Burke TW, Henao R,  
694 et al. A blood-based host gene expression assay for early detection of respiratory  
695 viral infection: an index-cluster prospective cohort study. *Lancet Infect Dis*.  
696 2021;21(3):396-404.
- 697 9. Carroll MW, Matthews DA, Hiscox JA, Elmore MJ, Pollakis G, Rambaut A, et  
698 al. Temporal and spatial analysis of the 2014-2015 Ebola virus outbreak in West  
699 Africa. *Nature*. 2015;524(7563):97-101.
- 700 10. Watson RJ, Tree J, Fotheringham SA, Hall Y, Dong X, Steeds K, et al. Dose-  
701 Dependent Response to Infection with Ebola Virus in the Ferret Model and Evidence  
702 of Viral Evolution in the Eye. *Journal of virology*. 2021;95(24):e0083321.
- 703 11. Russell CD, Valanciute A, Gachanja NN, Stephen J, Penrice-Randal R,  
704 Armstrong SD, et al. Tissue proteomic analysis identifies mechanisms and stages of  
705 immunopathology in fatal COVID-19. *American journal of respiratory cell and*  
706 *molecular biology*. 2022;66(2):196-205.
- 707 12. Nan Y, Ser JD, Walsh S, Schönlieb C, Roberts M, Selby I, et al. Data  
708 harmonisation for information fusion in digital healthcare: A state-of-the-art  
709 systematic review, meta-analysis and future research directions. *Information Fusion*.  
710 2022;82:99-122.
- 711 13. Halilaj I, Chatterjee A, van Wijk Y, Wu G, van Eeckhout B, Oberije C, et al.  
712 Covid19Risk.ai: An Open Source Repository and Online Calculator of Prediction  
713 Models for Early Diagnosis and Prognosis of Covid-19. *BioMed*. 2021;1(1):41-9.
- 714 14. Chatterjee A, Wu G, Primakov S, Oberije C, Woodruff H, Kubben P, et al. Can  
715 predicting COVID-19 mortality in a European cohort using only demographic and  
716 comorbidity data surpass age-based prediction: An externally validated study. *PLOS*  
717 *ONE*. 2021;16(4):e0249920.

- 718 15. Cen X, Wang F, Huang X, Jovic D, Dubee F, Yang H, et al. Towards precision  
719 medicine: Omics approach for COVID-19. *Biosaf Health*. 2023;5(2):78-88.
- 720 16. Teodori L, Osimani B, Isidoro C, Ramakrishna S. Mass versus personalized  
721 medicine against COVID-19 in the “system sciences” era. *Cytometry Part A*.  
722 2022;101(12):995-9.
- 723 17. Wang Z, He Y. Precision omics data integration and analysis with  
724 interoperable ontologies and their application for COVID-19 research. *Briefings in*  
725 *Functional Genomics*. 2021;20(4):235-48.
- 726 18. Venkataraman T, Coleman CM, Frieman MB. Overactive Epidermal Growth  
727 Factor Receptor Signaling Leads to Increased Fibrosis after Severe Acute  
728 Respiratory Syndrome Coronavirus Infection. *Journal of virology*. 2017;91(12).
- 729 19. Venkataraman T, Frieman MB. The role of epidermal growth factor receptor  
730 (EGFR) signaling in SARS coronavirus-induced pulmonary fibrosis. *Antiviral Res*.  
731 2017;143:142-50.
- 732 20. Vagapova ER, Lebedev TD, Prassolov VS. Viral fibrotic scoring and drug  
733 screen based on MAPK activity uncovers EGFR as a key regulator of COVID-19  
734 fibrosis. *Scientific Reports*. 2021;11(1):11234.
- 735 21. Chen S, Zhou Y, Chen Y, Gu J. fastp: an ultra-fast all-in-one FASTQ  
736 preprocessor. *Bioinformatics*. 2018;34(17):i884-i90.
- 737 22. Patro R, Duggal G, Love MI, Irizarry RA, Kingsford C. Salmon provides fast  
738 and bias-aware quantification of transcript expression. *Nature Methods*.  
739 2017;14(4):417-9.
- 740 23. Soneson C, Love MI, Robinson MD. Differential analyses for RNA-seq:  
741 transcript-level estimates improve gene-level inferences. *F1000Res*. 2015;4:1521.
- 742 24. Robinson MD, McCarthy DJ, Smyth GK. edgeR: a Bioconductor package for  
743 differential expression analysis of digital gene expression data. *Bioinformatics*.  
744 2010;26(1):139-40.
- 745 25. Szklarczyk D, Kirsch R, Koutrouli M, Nastou K, Mehryary F, Hachilif R, et al.  
746 The STRING database in 2023: protein-protein association networks and functional  
747 enrichment analyses for any sequenced genome of interest. *Nucleic Acids Res*.  
748 2023;51(D1):D638-d46.
- 749 26. Freshour SL, Kiwala S, Cotto KC, Coffman AC, McMichael JF, Song JJ, et al.  
750 Integration of the Drug-Gene Interaction Database (DGIdb 4.0) with open  
751 crowdsource efforts. *Nucleic Acids Res*. 2021;49(D1):D1144-d51.
- 752 27. Duquenne JB, Corhay JL, Louis R, Van Cauwenberge H. [Feasibility and  
753 effectiveness study of a simplified mobile self-education and self-monitoring  
754 application for patients with severe chronic obstructive pulmonary disease]. *Rev Med*  
755 *Liege*. 2022;77(2):110-7.
- 756 28. Farahani M, Niknam Z, Mohammadi Amirabad L, Amiri-Dashatan N, Koushki  
757 M, Nemati M, et al. Molecular pathways involved in COVID-19 and potential  
758 pathway-based therapeutic targets. *Biomedicine & Pharmacotherapy*.  
759 2022;145:112420.
- 760 29. Guiot J, Vaidyanathan A, Deprez L, Zerka F, Danthine D, Frix A-N, et al.  
761 Development and Validation of an Automated Radiomic CT Signature for Detecting  
762 COVID-19. *Diagnostics*. 2021;11(1):41.
- 763 30. Guiot J, Maes N, Winandy M, Henket M, Ernst B, Thys M, et al. Automated  
764 lung disease quantification in patients with COVID-19 as a predictive tool to assess  
765 hospitalization severity. *Frontiers in Medicine*. 2022;9.

- 766 31. Carpenè G, Onorato D, Nocini R, Fortunato G, Rizk JG, Henry BM, et al.  
767 Blood lactate concentration in COVID-19: a systematic literature review. *Clin Chem*  
768 *Lab Med*. 2022;60(3):332-7.
- 769 32. Chen W, Liu H, Yang G, Wang W, Liu Q, Huang C, et al. Effect of Direct  
770 Bilirubin Level on Clinical Outcome and Prognoses in Severely/Critically Ill Patients  
771 With COVID-19. *Front Med (Lausanne)*. 2022;9:843505.
- 772 33. Garvin MR, Alvarez C, Miller JI, Prates ET, Walker AM, Amos BK, et al. A  
773 mechanistic model and therapeutic interventions for COVID-19 involving a RAS-  
774 mediated bradykinin storm. *Elife*. 2020;9.
- 775 34. Lee C. Therapeutic Modulation of Virus-Induced Oxidative Stress via the Nrf2-  
776 Dependent Antioxidative Pathway. *Oxid Med Cell Longev*. 2018;2018:6208067.
- 777 35. Chen J, Wu W, Wang W, Tang Y, Lan H-Y. Role of TGF- $\beta$  Signaling in  
778 Coronavirus Disease 2019. *Integrative Medicine in Nephrology and Andrology*.  
779 2022;9(1):9.
- 780 36. Conway EM, Mackman N, Warren RQ, Wolberg AS, Mosnier LO, Campbell  
781 RA, et al. Understanding COVID-19-associated coagulopathy. *Nat Rev Immunol*.  
782 2022;22(10):639-49.
- 783 37. Fattahi S, Khalifehzadeh-Esfahani Z, Mohammad-Rezaei M, Mafi S, Jafarinia  
784 M. PI3K/Akt/mTOR pathway: a potential target for anti-SARS-CoV-2 therapy.  
785 *Immunol Res*. 2022;70(3):269-75.
- 786 38. Khezri MR, Varzandeh R, Ghasemnejad-Berenji M. The probable role and  
787 therapeutic potential of the PI3K/AKT signaling pathway in SARS-CoV-2 induced  
788 coagulopathy. *Cell Mol Biol Lett*. 2022;27(1):6.
- 789 39. Kindrachuk J, Ork B, Hart BJ, Mazur S, Holbrook MR, Frieman MB, et al.  
790 Antiviral potential of ERK/MAPK and PI3K/AKT/mTOR signaling modulation for  
791 Middle East respiratory syndrome coronavirus infection as identified by temporal  
792 kinome analysis. *Antimicrob Agents Chemother*. 2015;59(2):1088-99.
- 793 40. Channappanavar R, Perlman S. Pathogenic human coronavirus infections:  
794 causes and consequences of cytokine storm and immunopathology. *Semin*  
795 *Immunopathol*. 2017;39(5):529-39.
- 796 41. Azmi A, Rismani M, Pourmontaseri H, Mirzaii E, Niknia S, Miladpour B. The  
797 role of vitamin D receptor and IL-6 in COVID-19. *Mol Genet Genomic Med*.  
798 2023;11(7):e2172.
- 799 42. Hurst EA, Mellanby RJ, Handel I, Griffith DM, Rossi AG, Walsh TS, et al.  
800 Vitamin D insufficiency in COVID-19 and influenza A, and critical illness survivors: a  
801 cross-sectional study. *BMJ Open*. 2021;11(10):e055435.
- 802 43. Evans RM, Lippman SM. Shining Light on the COVID-19 Pandemic: A  
803 Vitamin D Receptor Checkpoint in Defense of Unregulated Wound Healing. *Cell*  
804 *Metabolism*. 2020;32(5):704-9.
- 805 44. Biernacka A, Dobaczewski M, Frangogiannis NG. TGF- $\beta$  signaling in fibrosis.  
806 *Growth Factors*. 2011;29(5):196-202.
- 807 45. Puddu P, Valenti P, Gessani S. Immunomodulatory effects of lactoferrin on  
808 antigen presenting cells. *Biochimie*. 2009;91(1):11-8.
- 809 46. Zimecki M, Actor JK, Kruzel ML. The potential for Lactoferrin to reduce SARS-  
810 CoV-2 induced cytokine storm. *Int Immunopharmacol*. 2021;95:107571.
- 811 47. Actor JK, Hwang SA, Kruzel ML. Lactoferrin as a natural immune modulator.  
812 *Curr Pharm Des*. 2009;15(17):1956-73.
- 813 48. Blumberg EA, Noll JH, Tebas P, Fraietta JA, Frank I, Marshall A, et al. A  
814 phase I trial of cyclosporine for hospitalized patients with COVID-19. *JCI Insight*.  
815 2022;7(11).

- 816 49. Devaux CA, Melenotte C, Piercecchi-Marti MD, Delteil C, Raoult D.  
817 Cyclosporin A: A Repurposable Drug in the Treatment of COVID-19? *Front Med*  
818 (Lausanne). 2021;8:663708.
- 819 50. Kamyshnyi A, Koval H, Kobevko O, Buchynskiy M, Oksenysh V, Kainov D, et  
820 al. Therapeutic Effectiveness of Interferon- $\alpha$ 2b against COVID-19 with Community-  
821 Acquired Pneumonia: The Ukrainian Experience. *Int J Mol Sci*. 2023;24(8).
- 822 51. Reis G, Moreira Silva EAS, Medeiros Silva DC, Thabane L, Campos VHS,  
823 Ferreira TS, et al. Early Treatment with Pegylated Interferon Lambda for Covid-19.  
824 *New England Journal of Medicine*. 2023;388(6):518-28.
- 825 52. Monk PD, Marsden RJ, Tear VJ, Brookes J, Batten TN, Mankowski M, et al.  
826 Safety and efficacy of inhaled nebulised interferon beta-1a (SNG001) for treatment  
827 of SARS-CoV-2 infection: a randomised, double-blind, placebo-controlled, phase 2  
828 trial. *The Lancet Respiratory Medicine*. 2021;9(2):196-206.
- 829 53. Shen X-R, Geng R, Li Q, Chen Y, Li S-F, Wang Q, et al. ACE2-independent  
830 infection of T lymphocytes by SARS-CoV-2. *Signal Transduction and Targeted*  
831 *Therapy*. 2022;7(1):83.
- 832 54. Day CJ, Bailly B, Guillon P, Dirr L, Jen FE, Spillings BL, et al. Multidisciplinary  
833 Approaches Identify Compounds that Bind to Human ACE2 or SARS-CoV-2 Spike  
834 Protein as Candidates to Block SARS-CoV-2-ACE2 Receptor Interactions. *mBio*.  
835 2021;12(2).
- 836 55. Paine R, Chasse R, Halstead ES, Nfonoyim J, Park DJ, Byun T, et al. Inhaled  
837 Sargramostim (Recombinant Human Granulocyte-Macrophage Colony-Stimulating  
838 Factor) for COVID-19-Associated Acute Hypoxemia: Results of the Phase 2,  
839 Randomized, Open-Label Trial (iLeukPulm). *Mil Med*. 2022;188(7-8):e2629-38.
- 840 56. Ku KB, Shin HJ, Kim HS, Kim BT, Kim SJ, Kim C. Repurposing Screens of  
841 FDA-Approved Drugs Identify 29 Inhibitors of SARS-CoV-2. *J Microbiol Biotechnol*.  
842 2020;30(12):1843-53.
- 843 57. Rajput A, Thakur A, Rastogi A, Choudhury S, Kumar M. Computational  
844 identification of repurposed drugs against viruses causing epidemics and pandemics  
845 via drug-target network analysis. *Comput Biol Med*. 2021;136:104677.
- 846 58. Mansour E, Palma AC, Ulaf RG, Ribeiro LC, Bernardes AF, Nunes TA, et al.  
847 Safety and Outcomes Associated with the Pharmacological Inhibition of the Kinin-  
848 Kallikrein System in Severe COVID-19. *Viruses*. 2021;13(2).
- 849 59. Hashimoto K. Overview of the potential use of fluvoxamine for COVID-19 and  
850 long COVID. *Discov Ment Health*. 2023;3(1):9.
- 851 60. Ziaei S, Alimohammadi-Kamalabadi M, Hasani M, Malekahmadi M, Persad E,  
852 Heshmati J. The effect of quercetin supplementation on clinical outcomes in COVID-  
853 19 patients: A systematic review and meta-analysis. *Food Science & Nutrition*.  
854 2023;11(12):7504-14.
- 855 61. Al Sbihi A, Manasrah N, Sano D. Can Lenalidomide Protect against Severe  
856 COVID-19 Symptoms in Multiple Myeloma Patients? A Case Series and Review of  
857 the Literature. *Eur J Case Rep Intern Med*. 2022;9(3):003216.
- 858 62. Amra B, Ashrafi F, Torki M, Hashemi M, Shirzadi M, Soltaninejad F, et al.  
859 Thalidomide for the Treatment of COVID-19 Pneumonia: A Randomized Controlled  
860 Clinical Trial. *Adv Biomed Res*. 2023;12:14.
- 861 63. Sundaresan L, Giri S, Singh H, Chatterjee S. Repurposing of thalidomide and  
862 its derivatives for the treatment of SARS-coV-2 infections: Hints on molecular action.  
863 *Br J Clin Pharmacol*. 2021;87(10):3835-50.
- 864
